# Supplementary material for: Heat-Treatments Affect Protease Activities and Peptide Profiles of Ruminants' Milk
Source: PubMed Central journal article supplement (PMC7987661; doi:10.3389/fnut.2021.626475), 2021-03-10
Supplement: Data_Sheet_1.pdf [file Data_Sheet_1.pdf]

**Supplementary Table 1** – Common peptide sequences between raw and heated at 63°C for 30 min ruminants' milk (bovine, ovine and caprine).

|                                    | Peptide sequence                    | Mass (Da) | <i>m/z</i> | Start <sup>1</sup> | End <sup>2</sup> | Protein name |
|------------------------------------|-------------------------------------|-----------|------------|--------------------|------------------|--------------|
| <b>Bovine milk</b><br>(3 peptides) | TVDMESTEVFTKK                       | 1514      | 757.87     | 153                | 165              | αS2-casein   |
|                                    | TVDMESTEVFTK                        | 1386      | 693.83     | 153                | 164              | αS2-casein   |
|                                    | AINPSKENLCSTFCK                     | 1652      | 551.60     | 42                 | 56               | αS2-casein   |
|                                    | TGPIPNSLPQNILPLTQTPVVVPPFLQPEIMGVPK | 3731      | 1244.70    | 78                 | 112              | β-casein     |
|                                    | YPFTGPIPN                           | 986       | 987.49     | 75                 | 83               | β-casein     |
|                                    | SLSQPKVLPVPQKAVPQRDMPIQAFL          | 3000      | 750.94     | 179                | 205              | β-casein     |
|                                    | HKEMPFKYPVEPFTESQSLTLTDVEK          | 3177      | 636.32     | 121                | 147              | β-casein     |
|                                    | EMPFKYPVEPFTESQSL                   | 2125      | 709.34     | 123                | 140              | β-casein     |
|                                    | TPVVVPPFLQPEIMGVPK                  | 1985      | 662.69     | 95                 | 112              | β-casein     |
|                                    | MPFKYPVEPFTESQS                     | 1883      | 942.44     | 124                | 139              | β-casein     |
|                                    | EPVLGPVRGPFIL                       | 1533      | 767.44     | 208                | 221              | β-casein     |
|                                    | HKEMPFKYPVEPFTESQSL                 | 2390      | 598.55     | 121                | 140              | β-casein     |
|                                    | YQEPVLGPVRGPFILV                    | 1894      | 948.04     | 206                | 222              | β-casein     |
|                                    | FQSEEQQTEDELQDKIHPFAQA              | 2825      | 942.75     | 48                 | 70               | β-casein     |
|                                    | PQNILPLTQTPVVVPPFLQPEIMGVPK         | 2952      | 984.89     | 86                 | 112              | β-casein     |
|                                    | PLTQTPVVVPPFLQPEIMGVPKVKE           | 2854      | 952.20     | 91                 | 115              | β-casein     |
|                                    | SLSQPKVLPVPQKAVPQRDMPIQA            | 2626      | 657.62     | 179                | 202              | β-casein     |
|                                    | QEPVLGPVRGPFILV                     | 1755      | 439.74     | 207                | 222              | β-casein     |
|                                    | QQTEDELQDK                          | 1275      | 638.29     | 54                 | 63               | β-casein     |
|                                    | TQTPVVVPPFLQPEIMGVPK                | 2214      | 554.55     | 93                 | 112              | β-casein     |
|                                    | SQPKVLPVPQKAVPQRDMPIQAFL            | 2816      | 704.90     | 181                | 205              | β-casein     |
|                                    | IEKFQSEEQQTEDELQDKIHPFAQA           | 3115      | 779.88     | 45                 | 70               | β-casein     |
|                                    | QSEEQQTEDELQDK                      | 1914      | 957.88     | 49                 | 63               | β-casein     |
|                                    | TPVVVPPFLQPEIM                      | 1582      | 791.93     | 95                 | 108              | β-casein     |
|                                    | FQSEEQQTEDELQDKIHPFAQAQS            | 3040      | 1014.44    | 48                 | 72               | β-casein     |
|                                    | YQEPVLGPVRGPFIL                     | 1819      | 607.32     | 206                | 221              | β-casein     |
|                                    | VPPFLQPEIMGVPKVKE                   | 1907      | 636.70     | 99                 | 115              | β-casein     |
|                                    | QPPQLPPTVMFPPQ                      | 1656      | 828.93     | 161                | 175              | β-casein     |
|                                    | QPPQLPP                             | 872       | 873.48     | 161                | 168              | β-casein     |
|                                    | EPVLGPVRGPF                         | 1307      | 654.36     | 208                | 219              | β-casein     |

|                             |                                      |        |         |     |                    |                        |
|-----------------------------|--------------------------------------|--------|---------|-----|--------------------|------------------------|
| Ovine milk<br>(95 peptides) | KFQSEEQQTEDELQDK                     | 2109   | 703.99  | 47  | 63                 | $\beta$ -casein        |
|                             | QPKVLPVPQ                            | 1005   | 503.31  | 182 | 190                | $\beta$ -casein        |
|                             | YQEPVL                               | 747    | 748.39  | 206 | 211                | $\beta$ -casein        |
|                             | EPVLPVVR                             | 866    | 433.76  | 208 | 215                | $\beta$ -casein        |
|                             | LPVPQKAVPQRDMPIQ                     | 1816   | 606.34  | 186 | 201                | $\beta$ -casein        |
|                             | QNILPLTQTPVVVPPFL                    | 1858   | 930.04  | 87  | 103                | $\beta$ -casein        |
|                             | FTGPIPNLSPQNILPLTQTPVVVPPFLQPEIMGVPK | 3878   | 970.54  | 77  | 112                | $\beta$ -casein        |
|                             | EQEELNVVGETVESLSSEESITHIN            | 3018   | 1510.13 | 17  | 42                 | $\beta$ -casein        |
|                             | TDVEKLHLPLPLVQS                      | 1686   | 562.98  | 143 | 157                | $\beta$ -casein        |
|                             | DMPIQA                               | 689    | 690.31  | 197 | 202                | $\beta$ -casein        |
|                             | MPFPKYPVEPFES                        | 1668   | 834.90  | 124 | 137                | $\beta$ -casein        |
|                             | PLTQTPVVVPPFLQPEIMGVPKVKET           | 2845   | 949.20  | 91  | 116                | $\beta$ -casein        |
|                             | VPQRDMPIQAFL                         | 1430   | 715.88  | 193 | 204                | $\beta$ -casein        |
|                             | VPPFLQPEIMGVPKVKETMVPK               | 2479   | 620.85  | 99  | 120                | $\beta$ -casein        |
|                             | EQEELNVV                             | 940    | 471.23  | 17  | 24                 | $\beta$ -casein        |
|                             | QSEEQQTEDELQDKIHQAQAQS               | 2813   | 938.77  | 49  | 72                 | $\beta$ -casein        |
|                             | EELNVVGETVESLSSEESITHIN              | 2681   | 1341.60 | 19  | 42                 | $\beta$ -casein        |
|                             | EELNVVGETVESLSSEESITHINK             | 2809   | 937.44  | 19  | 43                 | $\beta$ -casein        |
|                             | VQSWMHQPPQPLPPTVMFPPQSV              | 2643   | 882.11  | 155 | 177                | $\beta$ -casein        |
|                             | TQTPVVVPPFLQPEIMGVPKVKE              | 2548   | 850.47  | 93  | 115                | $\beta$ -casein        |
|                             | LNENKVL                              | 870    | 1462.68 | 105 | 111                | $\beta$ -lactoglobulin |
|                             | GTQYTDAPSFSDIPNPIGSENSGKITMP         | 2923   | 1387.66 | 185 | 212                | $\alpha$ S1-casein     |
|                             | TDAPSFSDIPNPIGSENSGKITMPLW           | 2773   | 644.35  | 189 | 214                | $\alpha$ S1-casein     |
|                             | NVPQLEIVPKSAEEQLH                    | 1930   | 609.31  | 120 | 136                | $\alpha$ S1-casein     |
|                             | NPIGSENSGKIT                         | 1217   | 1131.55 | 199 | 210                | $\alpha$ S1-casein     |
|                             | YLPLGTQYTDAPSFSDIPNPIGSENSGKITMP     | 3392   | 1078.53 | 181 | 212                | $\alpha$ S1-casein     |
|                             | SDIPNPIGSENSGKITMPLW                 | 2155   | 698.70  | 195 | 214                | $\alpha$ S1-casein     |
|                             | YNVPQLEIVPKSAEEQLH                   | 2093   | 576.29  | 119 | 136                | $\alpha$ S1-casein     |
|                             | KYNVPQLEIVPKSAEEQLH                  | 2301   | 903.92  | 118 | 136                | $\alpha$ S1-casein     |
|                             | AGSSSSSEIVPNSAEQK                    | 1806   | 710.71  | 77  | 94                 | $\alpha$ S1-casein     |
|                             | KHQGLSPEVLNENLLRF                    | 2129   | 748.66  | 22  | 38                 | $\alpha$ S1-casein     |
| SKDIGSEIEDQAMEDAKQM         | 2243                                 | 630.81 | 56      | 75  | $\alpha$ S1-casein |                        |
| KYNVPQLEIVPKSAEEQLHSM       | 2519                                 | 723.35 | 118     | 138 | $\alpha$ S1-casein |                        |

|                                 |      |         |     |     |                         |
|---------------------------------|------|---------|-----|-----|-------------------------|
| NPIGSENSGKITMP                  | 1445 | 1065.42 | 199 | 212 | $\alpha$ S1-casein      |
| AGSSSSSEEIVPNSAEQKY             | 2129 | 1195.55 | 77  | 95  | $\alpha$ S1-casein      |
| DAPSFSDIPNPIGSENSGKITMP         | 2389 | 949.93  | 190 | 212 | $\alpha$ S1-casein      |
| GSSSSSEEIVPNSAEQKY              | 1898 | 771.39  | 78  | 95  | $\alpha$ S1-casein      |
| YNVPQLEIVPKSAEEQLHSM            | 2311 | 411.92  | 119 | 138 | $\alpha$ S1-casein      |
| VLNENLLRFV                      | 1233 | 493.48  | 30  | 39  | $\alpha$ S1-casein      |
| LKKYNVPQLEIVPKSAEEQLH           | 2462 | 633.85  | 116 | 136 | $\alpha$ S1-casein      |
| KPWTQPKTNAI                     | 1266 | 697.80  | 207 | 217 | $\alpha$ S2-casein      |
| DMESTEVFTKK                     | 1394 | 641.75  | 156 | 166 | $\alpha$ S2-casein      |
| DMESTEVFTK                      | 1281 | 643.11  | 156 | 165 | $\alpha$ S2-casein      |
| VNREQLSTSEENSKKTIDMESTEVFTK     | 3210 | 1154.39 | 139 | 165 | $\alpha$ S2-casein      |
| DMESTEVFT                       | 1153 | 943.41  | 156 | 164 | $\alpha$ S2-casein      |
| SIRSSSEESA EVAPEEV              | 1885 | 987.40  | 69  | 85  | $\alpha$ S2-casein      |
| CTTSCEEVVRNANEEY                | 1973 | 655.28  | 52  | 68  | $\alpha$ S2-casein      |
| CTTSCEEVVRNA                    | 1309 | 562.74  | 52  | 63  | $\alpha$ S2-casein      |
| CTTSCEEVVR                      | 1123 | 703.68  | 52  | 61  | $\alpha$ S2-casein      |
| SSSEEPINISQEIYKQEK              | 2108 | 639.30  | 23  | 40  | $\alpha$ S2-casein      |
| EHVSSSEEPINISQEIYKQEK           | 2553 | 676.06  | 20  | 40  | $\alpha$ S2-casein      |
| MEHVSSEEPINISQEIYKQEK           | 2700 | 574.89  | 19  | 40  | $\alpha$ S2-casein      |
| HKMEHVSSEEPINISQEIYKQEK         | 2869 | 648.49  | 17  | 40  | $\alpha$ S2-casein      |
| KHKMEHVSSEEPINISQEIYKQEK        | 3237 | 809.70  | 16  | 40  | $\alpha$ S2-casein      |
| EHVSSSEEPINISQEIYKQE            | 2426 | 686.33  | 20  | 39  | $\alpha$ S2-casein      |
| HKMEHVSSEEPINISQEIYKQE          | 2741 | 723.67  | 17  | 39  | $\alpha$ S2-casein      |
| EHVSSSEEPINISQEIYK              | 2168 | 1639.21 | 20  | 37  | $\alpha$ S2-casein      |
| VVNAVDNPEASSESIASAPETNTAQVTSTEV | 3276 | 1403.15 | 162 | 192 | $\kappa$ -casein        |
| AVDNPEASSESIASAPETNTAQVTSTEV    | 2804 | 1447.60 | 165 | 192 | $\kappa$ -casein        |
| VDNPEASSESIASAPETNTAQVTSTEV     | 2893 | 1540.14 | 166 | 192 | $\kappa$ -casein        |
| NAVDNPEASSESIASAPETNTAQVTSTEV   | 3078 | 1243.54 | 164 | 192 | $\kappa$ -casein        |
| PEASSESIASAPETNTAQVTSTEV        | 2485 | 407.46  | 169 | 192 | $\kappa$ -casein        |
| DSVSSEVN                        | 915  | 572.28  | 271 | 278 | Osteopontin             |
| DPNHFRPAGLPNKY                  | 1626 | 526.05  | 134 | 147 | Serum amyloid A protein |
| GPGGVW                          | 571  | 436.25  | 65  | 70  | Serum amyloid A protein |
| GMTRDQVREDTKADQFANEWGR          | 2625 | 916.33  | 92  | 113 | Serum amyloid A protein |

|                               |                                 |      |         |     |     |                                                  |
|-------------------------------|---------------------------------|------|---------|-----|-----|--------------------------------------------------|
|                               | RPAGLPNKY                       | 1016 | 508.78  | 139 | 147 | Serum amyloid A protein                          |
|                               | GNYDAAQRGPGGVW                  | 1445 | 723.33  | 57  | 70  | Serum amyloid A protein                          |
|                               | INHQGLSPEVPNENLL                | 1773 | 591.98  | 20  | 35  | $\alpha$ 1-casein                                |
|                               | KYNVPQLEIVPKSAEEQLHSM           | 2519 | 630.81  | 117 | 137 | $\alpha$ 1-casein                                |
|                               | QGLSPEVLNENLLR                  | 1581 | 791.44  | 24  | 37  | $\alpha$ 1-casein                                |
|                               | IDMESTEVFTK                     | 1379 | 690.30  | 155 | 165 | $\alpha$ S2-casein                               |
|                               | KTIDMESTEVFTK                   | 1608 | 536.92  | 153 | 165 | $\alpha$ S2-casein                               |
|                               | RNAGPFTPTVNREQLSTSEENS          | 2513 | 838.71  | 130 | 151 | $\alpha$ S2-casein                               |
|                               | TIDMESTEVFTK                    | 1496 | 748.82  | 154 | 165 | $\alpha$ S2-casein                               |
|                               | QEPVLGPVR                       | 977  | 977.54  | 207 | 215 | $\beta$ -casein                                  |
|                               | QEPVLGPVRGPF                    | 1375 | 688.37  | 207 | 219 | $\beta$ -casein                                  |
|                               | QEPVLGPVRGPFPI                  | 1488 | 744.92  | 207 | 220 | $\beta$ -casein                                  |
| Caprine milk<br>(22 peptides) | QEPVLGPVRGPFPIIL                | 1601 | 801.46  | 207 | 221 | $\beta$ -casein                                  |
|                               | REQEELNVVG                      | 1172 | 586.80  | 16  | 25  | $\beta$ -casein                                  |
|                               | REQEELNVVGETVESLSSSEESITHIN     | 3094 | 1032.47 | 16  | 42  | $\beta$ -casein                                  |
|                               | REQEELNVVGETVESLSSSEESITHINK    | 3302 | 826.62  | 16  | 43  | $\beta$ -casein                                  |
|                               | REQEELNVVGETVESLSSSEESITHINKKIE | 3593 | 719.55  | 16  | 46  | $\beta$ -casein                                  |
|                               | YQEPVLGPVRGPFPIILV              | 1918 | 480.51  | 206 | 222 | $\beta$ -casein                                  |
|                               | QNQNPKLPLSILKEKQL               | 1990 | 498.55  | 78  | 94  | Glycosylation-dependent cell adhesion molecule 1 |
|                               | ETNTAQVTSTEV                    | 1359 | 680.29  | 181 | 192 | $\kappa$ -casein                                 |
|                               | IVNTVDNPEASSES                  | 1541 | 771.32  | 162 | 175 | $\kappa$ -casein                                 |
|                               | DQFANEWGR                       | 1121 | 561.75  | 106 | 114 | Serum amyloid A protein                          |
|                               | KDPNHFGPADLPDKY                 | 1713 | 571.95  | 114 | 128 | Serum amyloid A protein                          |
|                               | RGPGGAWAAKVISNA                 | 1454 | 485.60  | 65  | 79  | Serum amyloid A protein                          |

<sup>1</sup>**Start:** Starting position of peptide in the complete protein sequence.

<sup>2</sup>**End:** Ending position peptide in the complete protein sequence.

**Supplementary Table 2** – Common peptide sequences between raw and heated at 85°C for 5 min ruminants' milk (bovine, ovine and caprine).

|                                    | Peptide sequence                    | Mass (Da) | m/z     | Start <sup>1</sup> | End <sup>2</sup> | Protein name                                     |
|------------------------------------|-------------------------------------|-----------|---------|--------------------|------------------|--------------------------------------------------|
| <b>Bovine milk</b><br>(5 peptides) | QEPVLGPVR                           | 977       | 977.54  | 209                | 217              | β-casein                                         |
|                                    | TVDMESTEVEFTK                       | 1402      | 701.82  | 153                | 164              | αS2-casein                                       |
|                                    | PEVIESPPEINTVQVTSTAV                | 2109      | 1055.55 | 171                | 190              | κ-casein                                         |
|                                    | QPQSQNPKLPLSIL                      | 1545      | 773.44  | 75                 | 88               | Glycosylation-dependent cell adhesion molecule 1 |
|                                    | SSRQPQSQNPKLPLSILKEK                | 2259      | 452.86  | 72                 | 91               | Glycosylation-dependent cell adhesion molecule 1 |
| <b>Ovine milk</b><br>(41 peptides) | QNILPLTQTPVVVPPFLQPEIMGVPK          | 2838      | 1419.79 | 87                 | 112              | β-casein                                         |
|                                    | QPKVLPVPQK                          | 1116      | 558.84  | 182                | 191              | β-casein                                         |
|                                    | QPPQPLPPTVMFPPQSV                   | 1842      | 921.98  | 161                | 177              | β-casein                                         |
|                                    | EQEELNVVGETVESLSSEESITHIN           | 2858      | 1430.17 | 17                 | 42               | β-casein                                         |
|                                    | TQTPVVVPPFLQPEIMGVPK                | 2192      | 731.74  | 93                 | 112              | β-casein                                         |
|                                    | IEKFQSEEQQTEDELQDK                  | 2351      | 784.70  | 45                 | 63               | β-casein                                         |
|                                    | LTQTPVVVPPFLQPEIMGVPK               | 2305      | 769.43  | 92                 | 112              | β-casein                                         |
|                                    | KIEKFQSEEQQTEDELQDKIHPF             | 2973      | 595.70  | 44                 | 67               | β-casein                                         |
|                                    | TGPIPNLPLQNILPLTQTPVVVPPFLQPEIMGVPK | 3747      | 1250.03 | 78                 | 112              | β-casein                                         |
|                                    | MPPFKYPVEP                          | 1204      | 602.81  | 124                | 133              | β-casein                                         |
|                                    | PLTQTPVVVPPFLQPEIMGVPKV             | 2515      | 1258.71 | 91                 | 113              | β-casein                                         |
|                                    | PLTQTPVVVPPFLQPEI                   | 1874      | 938.03  | 91                 | 107              | β-casein                                         |
|                                    | QPPQPLPPTVMFPPQS                    | 1776      | 888.95  | 161                | 176              | β-casein                                         |
|                                    | QSEEQQTEDELQDK                      | 1818      | 909.90  | 49                 | 63               | β-casein                                         |
|                                    | QNILPLTQTPVVVPPFLQPEIMGVPKVKETMVPK  | 3799      | 950.78  | 87                 | 120              | β-casein                                         |
|                                    | SWMHQPPQPLPPTVMFPPQSV               | 2400      | 801.07  | 157                | 177              | β-casein                                         |
|                                    | PQNILPLTQTPVVVPPFLQPEI              | 2440      | 1221.20 | 86                 | 107              | β-casein                                         |
|                                    | NPIGSENSGKITMP                      | 1444      | 722.86  | 199                | 212              | αS1-casein                                       |
|                                    | YLPLGTQYTDAPSFSDIPNPIGSENSGKITMP    | 3426      | 1142.88 | 181                | 212              | αS1-casein                                       |
|                                    | TDAPSFSDIPNPIGSENSGKITMP            | 2474      | 1238.08 | 189                | 212              | αS1-casein                                       |
|                                    | LPLGTQYTDAPSFSDIPNPIGSENSGKITMP     | 3263      | 1088.53 | 182                | 212              | αS1-casein                                       |
|                                    | IPNPIGSENSGKITMP                    | 1654      | 827.93  | 197                | 212              | αS1-casein                                       |
|                                    | GSSSSSEEIVPNSAEQKY                  | 1978      | 989.92  | 78                 | 95               | αS1-casein                                       |
|                                    | AGSSSSSEEIVPNSAEQK                  | 1886      | 943.91  | 77                 | 94               | αS1-casein                                       |
| VNREQLSTSEENSKKTIDMESTEVEFTK       | 3210                                | 643.11    | 139     | 165                | αS2-casein       |                                                  |

|                                      |                                  |      |         |     |     |                                                  |
|--------------------------------------|----------------------------------|------|---------|-----|-----|--------------------------------------------------|
|                                      | DMESTEVFT                        | 1073 | 1074.43 | 156 | 164 | $\alpha$ S2-casein                               |
|                                      | SIRSSSEESA EVAPEEV               | 1805 | 903.42  | 69  | 85  | $\alpha$ S2-casein                               |
|                                      | CTTSCEEVVR                       | 1123 | 562.74  | 52  | 61  | $\alpha$ S2-casein                               |
|                                      | MEHVSSSEEPINISQEIYKQEK           | 2684 | 672.06  | 19  | 40  | $\alpha$ S2-casein                               |
|                                      | HKMEHVSSSEEPINISQEIYKQEK         | 2885 | 578.09  | 17  | 40  | $\alpha$ S2-casein                               |
|                                      | KHKMEHVSSSEEPINISQEIYKQEK        | 3157 | 632.49  | 16  | 40  | $\alpha$ S2-casein                               |
|                                      | EHVSSSEEPINISQEIYK               | 2168 | 723.67  | 20  | 37  | $\alpha$ S2-casein                               |
|                                      | EHVSSSEEPINISQE                  | 1764 | 882.87  | 20  | 34  | $\alpha$ S2-casein                               |
|                                      | EHVSSSEEPINI                     | 1340 | 670.82  | 20  | 31  | $\alpha$ S2-casein                               |
|                                      | VVNAV DNPEASSESIASAPETNTAQVTSTEV | 3196 | 1599.22 | 162 | 192 | $\kappa$ -casein                                 |
|                                      | PEASSESIASAPETNTAQVTSTEV         | 2565 | 1283.53 | 169 | 192 | $\kappa$ -casein                                 |
|                                      | NTAQVTSTEV                       | 1128 | 1129.47 | 183 | 192 | $\kappa$ -casein                                 |
|                                      | AVDNPEASSESIASAPETNTAQVTSTEV     | 2884 | 1443.13 | 165 | 192 | $\kappa$ -casein                                 |
|                                      | VDNPEASSESIASAPETNTAQVTSTEV      | 2893 | 1447.58 | 166 | 192 | $\kappa$ -casein                                 |
|                                      | SNVESPDATEEDF                    | 1519 | 1519.55 | 170 | 182 | Osteopontin                                      |
|                                      | NVESPDATEEDF                     | 1352 | 1352.55 | 171 | 182 | Osteopontin                                      |
|                                      | YNVPQLEIVPK                      | 1313 | 1313.72 | 118 | 128 | $\alpha$ S1-casein                               |
|                                      | KTIDMESTEVFTK                    | 1624 | 812.86  | 153 | 165 | $\alpha$ S2-casein                               |
|                                      | KIEKFQSEEQQQTEDELQDK             | 2559 | 1280.56 | 44  | 63  | $\beta$ -casein                                  |
|                                      | KKIEKFQSEEQQQTEDELQD             | 2560 | 1281.07 | 43  | 62  | $\beta$ -casein                                  |
| <b>Caprine milk</b><br>(10 peptides) | QEELNVVG                         | 886  | 887.45  | 18  | 25  | $\beta$ -casein                                  |
|                                      | REQEELNVVGETVESLSSSEESITHINK     | 3222 | 1075.17 | 16  | 43  | $\beta$ -casein                                  |
|                                      | QDENYEEAIVHLK                    | 1570 | 785.87  | 128 | 140 | Butyrophilin subfamily 1 member A1               |
|                                      | QNQNPKLPLSILKE                   | 1621 | 541.31  | 78  | 91  | Glycosylation-dependent cell adhesion molecule 1 |
|                                      | KDSKADQFANEWG                    | 1533 | 767.32  | 101 | 113 | Serum amyloid A protein                          |
|                                      | REAGQGAKDMW                      | 1264 | 632.79  | 26  | 36  | Serum amyloid A protein                          |

<sup>1</sup>**Start:** Starting position of peptide in the complete protein sequence.

<sup>2</sup>**End:** Ending position peptide in the complete protein sequence.

**Supplementary Table 3** - Peptides found in each treatment (raw, 63°C/30 min and 85°C/5 min) and species (bovine, ovine and caprine) combination that have an exact match with the bioactive peptides database (MBPDB)

|                    | Treatment                   | Peptide                  | Protein description    | Function                          | Reference                         |
|--------------------|-----------------------------|--------------------------|------------------------|-----------------------------------|-----------------------------------|
| <b>Bovine milk</b> | Raw<br>(3 peptides)         | LPQNIPPLT                | $\beta$ -casein        | DPP-IV inhibitory                 | Nongonierma and FitzGerald (2016) |
|                    |                             | LPLP                     | $\beta$ -casein        | ACE-inhibitory                    | Kohmura et al. (1990)             |
|                    |                             | TPEVDDEALEK              | $\beta$ -lactoglobulin | DPP-IV inhibitory                 | Silveira et al. (2013)            |
|                    | 63°C/30 min<br>(5 peptides) | FPEVFGK                  | $\alpha$ S1-casein     | ACE-inhibitory                    | Maruyama et al. (1987)            |
|                    |                             | RELEELNVPGEIVESLSSEESITR | $\beta$ -casein        | Immunomodulatory                  | Hata et al. (1998)                |
|                    |                             | VLPVPQKAVPYPQR           | $\beta$ -casein        | Antimicrobial                     | Sedaghati et al. (2016)           |
|                    |                             | EPVLPVVRGPF              | $\beta$ -casein        | ACE-inhibitory                    | Hayes et al. (2007)               |
|                    |                             | LIVTQTMK                 | $\beta$ -lactoglobulin | Cytotoxic                         | Jacquot (2010)                    |
|                    | 85°C/5 min<br>(3 peptides)  | QMEAESISSSEEIVPNSVEQK    | $\alpha$ S1-casein     | Immunomodulatory                  | Hata et al. (1998)                |
|                    |                             | NMAINPSKENLCSTFCK        | $\alpha$ S2-casein     | ACE-inhibitory                    | Tu et al. (2018)                  |
|                    |                             | RELEELNVPGEIVESLSSEESITR | $\beta$ -casein        | Immunomodulatory                  | Hata et al. (1998)                |
|                    | Raw<br>(26 peptides)        | DAYPSGAW                 | $\alpha$ S1-casein     | ACE-inhibitory                    | Pihlanto-Leppälä et al. (1998)    |
|                    |                             | RYL                      | $\alpha$ S1-casein     | Antioxidant                       | Contreras et al. (2013)           |
|                    |                             | VLNENLLR                 | $\alpha$ S1-casein     | Antimicrobial                     | Hayes et al. (2006)               |
|                    |                             | YLEQLLR                  | $\alpha$ S1-casein     | Antimicrobial                     | Liu et al. (2015)                 |
| YLGYLEQ            |                             | $\alpha$ S1-casein       | Anxiolytic             | Cakir-Kiefer et al. (2011)        |                                   |
| VPSELYL            |                             | $\alpha$ S1-casein       | ACE-inhibitory         | Ruiz et al. (2004)                |                                   |
| NPWDQ              |                             | $\alpha$ S2-casein       | Immunomodulatory       | Isobe et al. (2008)               |                                   |
| VRYL               |                             | $\alpha$ S2-casein       | ACE-inhibitory         | Ruiz et al. (2004)                |                                   |
| YQKFPQY            |                             | $\alpha$ S2-casein       | ACE-inhibitory         | Silva et al. (2006)               |                                   |
| HLPLP              |                             | $\beta$ -casein          | ACE-inhibitory         | Kohmura et al. (1990)             |                                   |
| LPLP               |                             | $\beta$ -casein          | ACE-inhibitory         | Kohmura et al. (1990)             |                                   |
| EPVLPVVRGPF        |                             | $\beta$ -casein          | ACE-inhibitory         | Hayes et al. (2007)               |                                   |
| GPFPI              |                             | $\beta$ -casein          | Cathepsin B Inhibitory | Lee and Lee (2000)                |                                   |
| LPVP               |                             | $\beta$ -casein          | DPP-IV inhibitory      | Nongonierma et al. (2018)         |                                   |
| LPVPQ              |                             | $\beta$ -casein          | DPP-IV inhibitory      | Nongonierma and FitzGerald (2016) |                                   |
| MPFPKYPVEP         | $\beta$ -casein             | ACE-inhibitory           | Hayes et al. (2007)    |                                   |                                   |
| YQEPVLGP           | $\beta$ -casein             | Antioxidant              | Silva et al. (2006)    |                                   |                                   |

|                            |                              |                    |                        |                                |                                   |                                |
|----------------------------|------------------------------|--------------------|------------------------|--------------------------------|-----------------------------------|--------------------------------|
| <b>Ovine milk</b>          |                              | YQEPVLGPVRGPFPI    | $\beta$ -casein        | Antimicrobial                  | Almaas et al. (2011)              |                                |
|                            |                              | TPVVVPPFLQP        | $\beta$ -casein        | ACE-inhibitory                 | Abubakar et al. (1998)            |                                |
|                            |                              | VLPVPQK            | $\beta$ -casein        | Antioxidant                    | Shanmugam et al. (2015)           |                                |
|                            |                              | YPVEPFTE           | $\beta$ -casein        | Bradykinin-Potentiating        | Perpetuo et al. (2003)            |                                |
|                            |                              | YQEPVL             | $\beta$ -casein        | ACE-inhibitory                 | Pihlanto-Leppälä et al. (1998)    |                                |
|                            |                              | HPHPHLSF           | $\kappa$ -casein       | ACE-inhibitory                 | Gómez-Ruiz et al. (2007)          |                                |
|                            |                              | IPIQY              | $\kappa$ -casein       | ACE-inhibitory                 | Nongonierma and FitzGerald (2014) |                                |
|                            |                              | YIPIQY             | $\kappa$ -casein       | DPP-IV inhibitory              | Gómez-Ruiz et al. (2007)          |                                |
|                            |                              | LRP                | Lactotransferrin       | ACE-inhibitory                 | García-Tejedor et al. (2014)      |                                |
|                            | 63°C/30 min<br>(15 peptides) |                    | FPQYLQY                | $\alpha$ S2-casein             | ACE-inhibitory                    | Tauzin et al. (2002)           |
|                            |                              |                    | FPQY                   | $\alpha$ S2-casein             | ACE-inhibitory                    | Contreras et al. (2013)        |
|                            |                              |                    | EPVLGPVRGPFPI          | $\beta$ -casein                | ACE-inhibitory                    | Hayes et al. (2007)            |
|                            |                              |                    | YQEPVL                 | $\beta$ -casein                | ACE-inhibitory                    | Pihlanto-Leppälä et al. (1998) |
|                            |                              |                    | QSLVYP                 | $\beta$ -casein                | ACE-inhibitory                    | Kohmura et al. (1990)          |
|                            |                              |                    | EPVLGPVRGP             | $\beta$ -casein                | Cytomodulatory                    | Zhao et al. (2014)             |
|                            |                              | LPQNILP            | $\beta$ -casein        | ACE-inhibitory                 | Kohmura et al. (1990)             |                                |
|                            |                              | LPLPL              | $\beta$ -casein        | DPP-IV inhibitory              | Nongonierma and FitzGerald (2014) |                                |
|                            |                              | YPVEPF             | $\beta$ -casein        | DPP-IV inhibitory              | Nongonierma and FitzGerald (2016) |                                |
|                            |                              | QEPVL              | $\beta$ -casein        | immunomodulatory               | Jiehui et al. (2014)              |                                |
|                            |                              | YQEPVLGPVR         | $\beta$ -casein        | Immunomodulatory               | Kayser and Meisel (1996)          |                                |
|                            |                              | YPVEPF             | $\beta$ -casein        | Opioid                         | Plaisancié et al. (2015)          |                                |
|                            |                              | IYP                | $\beta$ -casein        | ACE-inhibitory                 | Kohmura et al. (1990)             |                                |
|                            |                              | IIVTQTMK           | $\beta$ -lactoglobulin | Antimicrobial                  | Almaas et al. (2011)              |                                |
|                            |                              | YPSYGLN            | $\kappa$ -casein       | Opioid                         | Meisel et al. (1989)              |                                |
| 85°C/5 min<br>(7 peptides) |                              | GPFPILV            | $\beta$ -casein        | DPP-IV inhibitory              | Zhang et al. (2016)               |                                |
|                            |                              | LVYP               | $\beta$ -casein        | ACE-inhibitory                 | Kohmura et al. (1990)             |                                |
|                            |                              | LVYPFTGPIP         | $\beta$ -casein        | ACE-inhibitory                 | Quirós et al. (2005)              |                                |
|                            |                              | MPFPKYPVEP         | $\beta$ -casein        | ACE-inhibitory                 | Hayes et al. (2007)               |                                |
|                            |                              | QSLVYP             | $\beta$ -casein        | ACE-inhibitory                 | Kohmura et al. (1990)             |                                |
|                            |                              | REQEELNV           | $\beta$ -casein        | Antimicrobial                  | Kohmura et al. (1990)             |                                |
|                            |                              | TQTPVVVPPFLQPE     | $\beta$ -casein        | Antioxidant                    | Sabeena Farvin et al. (2010)      |                                |
| Raw                        | DAYPSGAW                     | $\alpha$ S1-casein | ACE-inhibitory         | Pihlanto-Leppälä et al. (1998) |                                   |                                |



|                           |                             |                 |                    |                              |                                |
|---------------------------|-----------------------------|-----------------|--------------------|------------------------------|--------------------------------|
| Caprine milk              | (12 peptides)               | VLNENLLR        | $\alpha$ S1-casein | Antimicrobial                | Hayes et al. (2006)            |
|                           |                             | EPVLGPVRGPF     | $\beta$ -casein    | ACE-inhibitory               | Hayes et al. (2007)            |
|                           |                             | GPFILV          | $\beta$ -casein    | DPP-IV inhibitory            | Zhang et al. (2016)            |
|                           |                             | KIHPFAQAQ       | $\beta$ -casein    | ACE-inhibitory               | Quirós et al. (2005)           |
|                           |                             | REQEELNV        | $\beta$ -casein    | Antimicrobial                | Almaas et al. (2011)           |
|                           |                             | YQEPVL          | $\beta$ -casein    | ACE-inhibitory               | Pihlanto-Leppälä et al. (1998) |
|                           |                             | YQEPVLGP        | $\beta$ -casein    | Antioxidant                  | Silva et al. (2006)            |
|                           |                             | YQEPVLGPVR      | $\beta$ -casein    | Immunomodulatory             | Lu et al. (2016)               |
|                           |                             | YQEPVLGPVRGPFPI | $\beta$ -casein    | Antimicrobial                | Almaas et al. (2011)           |
|                           |                             | YIPIQY          | $\kappa$ -casein   | ACE-inhibitory               | Gómez-Ruiz et al. (2007)       |
|                           |                             | YVL             | $\kappa$ -casein   | Antioxidant                  | López-Expósito et al. (2007)   |
|                           |                             | QEPVL           | $\beta$ -casein    | Immunomodulatory             | Jiehui et al. (2014)           |
|                           | 63°C/30 min<br>(4 peptides) | LVYP            | $\beta$ -casein    | ACE-inhibitory               | Kohmura et al. (1990)          |
|                           | VLPVPQK                     | $\beta$ -casein | Antioxidant        | Shanmugam et al. (2015)      |                                |
|                           | TQTPVVVPPFLQPE              | $\beta$ -casein | Antioxidant        | Sabeena Farvin et al. (2010) |                                |
| 85°C/5 min<br>(1 peptide) | LVYPFTGPIP                  | $\beta$ -casein | ACE-inhibitory     | Quirós et al. (2005)         |                                |

## References

- Abubakar, A., Saito, T., Kitazawa, H., Kawai, Y., and Itoh, T. (1998). Structural Analysis of New Antihypertensive Peptides Derived from Cheese Whey Protein by Proteinase K Digestion. *Journal of Dairy Science* 81(12), 3131-3138. doi: [https://doi.org/10.3168/jds.S0022-0302\(98\)75878-3](https://doi.org/10.3168/jds.S0022-0302(98)75878-3).
- Almaas, H., Eriksen, E., Sekse, C., Comi, I., Flengsrud, R., Holm, H., et al. (2011). Antibacterial peptides derived from caprine whey proteins, by digestion with human gastrointestinal juice. *British Journal of Nutrition* 106(6), 896-905. doi: 10.1017/S0007114511001085.
- Cakir-Kiefer, C., Le Roux, Y., Balandras, F., Trabalon, M., Dary, A., Laurent, F., et al. (2011). In Vitro Digestibility of  $\alpha$ -Caseozepine, a Benzodiazepine-like Peptide from Bovine Casein, and Biological Activity of Its Main Proteolytic Fragment. *Journal of Agricultural and Food Chemistry* 59(9), 4464-4472. doi: 10.1021/jf104089c.
- Contreras, M.d.M., Sanchez, D., Sevilla, M.Á., Recio, I., and Amigo, L. (2013). Resistance of casein-derived bioactive peptides to simulated gastrointestinal digestion. *International Dairy Journal* 32(2), 71-78. doi: <https://doi.org/10.1016/j.idairyj.2013.05.008>.
- García-Tejedor, A., Sánchez-Rivera, L., Castelló-Ruiz, M., Recio, I., Salom, J.B., and Manzanares, P. (2014). Novel antihypertensive lactoferrin-derived peptides produced by *Kluyveromyces marxianus*: gastrointestinal stability profile and in vivo angiotensin I-converting enzyme (ACE) inhibition. *J Agric Food Chem* 62(7), 1609-1616. doi: 10.1021/jf4053868.
- Gómez-Ruiz, J.Á., Ramos, M., and Recio, I. (2007). Identification of novel angiotensin-converting enzyme-inhibitory peptides from ovine milk proteins by CE-MS and chromatographic techniques. *ELECTROPHORESIS* 28(22), 4202-4211. doi: 10.1002/elps.200700324.
- Hata, I., Higashiyama, S., and Otani, H. (1998). Identification of a phosphopeptide in bovine alpha s1-casein digest as a factor influencing proliferation and immunoglobulin production in lymphocyte cultures. *The Journal of dairy research* 65(4), 569-578. doi: 10.1017/s0022029998003136.

- Hayes, M., Ross, R.P., Fitzgerald, G.F., Hill, C., and Stanton, C. (2006). Casein-derived antimicrobial peptides generated by *Lactobacillus acidophilus* DPC6026. *Appl Environ Microbiol* 72(3), 2260-2264. doi: 10.1128/aem.72.3.2260-2264.2006.
- Hayes, M., Stanton, C., Slattery, H., O'Sullivan, O., Hill, C., Fitzgerald, G.F., et al. (2007). Casein Fermentate of *Lactobacillus animalis* DPC6134 Contains a Range of Novel Propeptide Angiotensin-Converting Enzyme Inhibitors. *Applied and Environmental Microbiology* 73(14), 4658-4667. doi: 10.1128/aem.00096-07.
- Isobe, N., Suzuki, M., Oda, M., and Tanabe, S. (2008). Enzyme-Modified Cheese Exerts Inhibitory Effects on Allergen Permeation in Rats Suffering from Indomethacin-Induced Intestinal Inflammation. *Bioscience, Biotechnology, and Biochemistry* 72(7), 1740-1745. doi: 10.1271/bbb.80042.
- Jacquot, A. (2010). Proliferative effects of synthetic peptides from  $\beta$ -lactoglobulin and  $\alpha$ -lactalbumin on murine splenocytes. *International dairy journal* v. 20(no. 8), pp. 514-521-2010 v.2020 no.2018. doi: 10.1016/j.idairyj.2010.02.013.
- Jiehui, Z., Liuliu, M., Haihong, X., Yang, G., Yingkai, J., Lun, Z., et al. (2014). Immunomodulating effects of casein-derived peptides QEPVL and QEPV on lymphocytes in vitro and in vivo. *Food & Function* 5(9), 2061-2069. doi: 10.1039/C3FO60657K.
- Kayser, H., and Meisel, H. (1996). Stimulation of human peripheral blood lymphocytes by bioactive peptides derived from bovine milk proteins. *FEBS Letters* 383(1-2), 18-20. doi: 10.1016/0014-5793(96)00207-4.
- Kohmura, M., Nio, N., and Ariyoshi, Y. (1990). Inhibition of Angiotensin-Converting Enzyme by Synthetic Peptide Fragments of Various  $\beta$ -Caseins. *Agricultural and Biological Chemistry* 54(4), 1101-1102. doi: 10.1271/bbb1961.54.1101.
- Lee, H.S., and Lee, K.J. (2000). Cathepsin B inhibitory peptides derived from  $\beta$ -casein. *Peptides* 21(6), 807-809. doi: [https://doi.org/10.1016/S0196-9781\(00\)00212-6](https://doi.org/10.1016/S0196-9781(00)00212-6).
- Liu, Y., Eichler, J., and Pischetsrieder, M. (2015). Virtual screening of a milk peptide database for the identification of food-derived antimicrobial peptides. *Molecular Nutrition & Food Research* 59(11), 2243-2254. doi: 10.1002/mnfr.201500182.
- López-Expósito, I., Quirós, A., Amigo, L., and Recio, I. (2007). Casein hydrolysates as a source of antimicrobial, antioxidant and antihypertensive peptides. *Lait* 87(4-5), 241-249.
- Lu, Y., Govindasamy-Lucey, S., and Lucey, J.A. (2016). Angiotensin-I-converting enzyme-inhibitory peptides in commercial Wisconsin Cheddar cheeses of different ages. *Journal of Dairy Science* 99(1), 41-52. doi: <https://doi.org/10.3168/jds.2015-9569>.
- Maruyama, S., Mitachi, H., Tanaka, H., Tomizuka, N., and Suzuki, H. (1987). Studies on the Active Site and Antihypertensive Activity of Angiotensin I-Converting Enzyme Inhibitors Derived from Casein. *Agricultural and Biological Chemistry* 51(6), 1581-1586. doi: 10.1080/00021369.1987.10868244.
- Meisel, H., Frister, H., and Schlimme, E. (1989). Biologically active peptides in milk proteins. *Zeitschrift für Ernährungswissenschaft* 28(4), 267-278. doi: 10.1007/BF02019390.
- Nongonierma, A.B., and FitzGerald, R.J. (2014). Susceptibility of milk protein-derived peptides to dipeptidyl peptidase IV (DPP-IV) hydrolysis. *Food Chemistry* 145, 845-852. doi: <https://doi.org/10.1016/j.foodchem.2013.08.097>.
- Nongonierma, A.B., and FitzGerald, R.J. (2016). Structure activity relationship modelling of milk protein-derived peptides with dipeptidyl peptidase IV (DPP-IV) inhibitory activity. *Peptides* 79, 1-7. doi: <https://doi.org/10.1016/j.peptides.2016.03.005>.
- Nongonierma, A.B., Paoletta, S., Mudgil, P., Maqsood, S., and FitzGerald, R.J. (2018). Identification of novel dipeptidyl peptidase IV (DPP-IV) inhibitory peptides in camel milk protein hydrolysates. *Food Chem* 244, 340-348. doi: 10.1016/j.foodchem.2017.10.033.
- Perpetuo, E.A., Juliano, L., and Lebrun, I. (2003). Biochemical and Pharmacological Aspects of Two Bradykinin-Potentiating Peptides Obtained from Tryptic Hydrolysis of Casein. *Journal of Protein Chemistry* 22(7), 601-606. doi: 10.1023/B:JOPC.0000008724.98339.ff.
- Pihlanto-Leppälä, A., Rokka, T., and Korhonen, H. (1998). Angiotensin I Converting Enzyme Inhibitory Peptides Derived from Bovine Milk Proteins. *International Dairy Journal* 8(4), 325-331. doi: [https://doi.org/10.1016/S0958-6946\(98\)00048-X](https://doi.org/10.1016/S0958-6946(98)00048-X).
- Plaisancié, P., Boutrou, R., Estienne, M., Henry, G., Jardin, J., Paquet, A., et al. (2015).  $\beta$ -Casein(94-123)-derived peptides differently modulate production of mucins in intestinal goblet cells. *Journal of Dairy Research* 82(1), 36-46. doi: 10.1017/S0022029914000533.
- Quirós, A., Hernández-Ledesma, B., Ramos, M., Amigo, L., and Recio, I. (2005). Angiotensin-Converting Enzyme Inhibitory Activity of Peptides Derived from Caprine Kefir. *Journal of Dairy Science* 88(10), 3480-3487. doi: [https://doi.org/10.3168/jds.S0022-0302\(05\)73032-0](https://doi.org/10.3168/jds.S0022-0302(05)73032-0).

- Ruiz, J.Á.G., Ramos, M., and Recio, I. (2004). Angiotensin converting enzyme-inhibitory activity of peptides isolated from Manchego cheese. Stability under simulated gastrointestinal digestion. *International Dairy Journal* 14(12), 1075-1080. doi: <https://doi.org/10.1016/j.idairyj.2004.04.007>.
- Sabeena Farvin, K.H., Baron, C.P., Nielsen, N.S., Otte, J., and Jacobsen, C. (2010). Antioxidant activity of yoghurt peptides: Part 2 – Characterisation of peptide fractions. *Food Chemistry* 123(4), 1090-1097. doi: <https://doi.org/10.1016/j.foodchem.2010.05.029>.
- Sedaghati, M., Kobarfard, F., Ezzatpanah, H., Boojar, M.M.A., and Ebrahimi, M.T. (2016). Isolation and identification of some antibacterial peptides in the plasmin-digest of  $\beta$ -casein. *Lebensmittel-Wissenschaft + [i.e. und] Technologie. Food science + technology. Science + technologie alimentaire* 68, 217-225. doi: 10.1016/j.lwt.2015.12.019.
- Shanmugam, V.P., Kapila, R., Kapila, S., and Sonfack, T.K. (2015). Antioxidative peptide derived from enzymatic digestion of buffalo casein. *International dairy journal* 42, 1-5. doi: 10.1016/j.idairyj.2014.11.001.
- Silva, S.V., Pihlanto, A., and Malcata, F.X. (2006). Bioactive Peptides in Ovine and Caprine Cheeselike Systems Prepared with Proteases from *Cynara cardunculus*. *Journal of Dairy Science* 89(9), 3336-3344. doi: [https://doi.org/10.3168/jds.S0022-0302\(06\)72370-0](https://doi.org/10.3168/jds.S0022-0302(06)72370-0).
- Silveira, S.T., Martínez-Maqueda, D., Recio, I., and Hernández-Ledesma, B. (2013). Dipeptidyl peptidase-IV inhibitory peptides generated by tryptic hydrolysis of a whey protein concentrate rich in  $\beta$ -lactoglobulin. *Food Chem* 141(2), 1072-1077. doi: 10.1016/j.foodchem.2013.03.056.
- Tauzin, J., Miclo, L., and Gaillard, J.-L. (2002). Angiotensin-I-converting enzyme inhibitory peptides from tryptic hydrolysate of bovine  $\alpha$ S2-casein. *FEBS Letters* 531(2), 369-374. doi: 10.1016/s0014-5793(02)03576-7.
- Tu, M., Wang, C., Chen, C., Zhang, R., Liu, H., Lu, W., et al. (2018). Identification of a novel ACE-inhibitory peptide from casein and evaluation of the inhibitory mechanisms. *Food Chem* 256, 98-104. doi: 10.1016/j.foodchem.2018.02.107.
- Zhang, Y., Fanglei, Z., Huiqin, M., Ran, C., Shangwu, C., and Yanchun, Z. (2016). Comparison of dipeptidyl peptidase IV-inhibitory activity of peptides from bovine and caprine milk casein by in silico and in vitro analyses. *International dairy journal* 53, 37-44. doi: 10.1016/j.idairyj.2015.10.001.
- Zhao, H., Zhou, F., Wang, L., Fengling, B., Dziugan, P., Walczak, P., et al. (2014). Characterization of a bioactive peptide with cytomodulatory effect released from casein. *European Food Research and Technology* 238(2), 315-322. doi: 10.1007/s00217-013-2106-7.
